# Supplementary material for: Pt-Chitosan-TiO2 for Efficient Photocatalytic Hydrogen Evolution via Ligand-to-Metal Charge Transfer Mechanism under Visible Light
Source: MDPI journal article supplement (doi:10.3390/molecules27154673), 2022-07-22
Supplement: s1 [file s1]

**Table S1.** Table of the samples (pt-mDDn-Tt)

| Sapmle ID               | titanium<br>sol (mL) | Chitosan<br>(g) | degree of deacety-<br>lation (%) | Temperature<br>(°C) | Time (h) |
|-------------------------|----------------------|-----------------|----------------------------------|---------------------|----------|
| 1# Pt-T200              | 25                   | 0               | /                                | 200                 | 3        |
| 2# Pt-10%DD25-<br>T200  | 25                   | 0.075           | 25                               | 200                 | 3        |
| 3# Pt-10%DD45-<br>T200  | 25                   | 0.075           | 45                               | 200                 | 3        |
| 4# Pt-10%DD65-<br>T200  | 25                   | 0.075           | 65                               | 200                 | 3        |
| 5# Pt-10%DD75-<br>T200  | 25                   | 0.075           | 75                               | 200                 | 3        |
| 6# Pt-10%DD85-<br>T200  | 25                   | 0.075           | 85                               | 200                 | 3        |
| 7# Pt-10%DD95-<br>T200  | 25                   | 0.075           | 95                               | 200                 | 3        |
| 8# Pt-5%DD75-<br>T200   | 25                   | 0.0355          | 75                               | 200                 | 3        |
| 9# Pt-20%DD75-<br>T200  | 25                   | 0.169           | 75                               | 200                 | 3        |
| 10# Pt-10%DD75-<br>T150 | 25                   | 0.075           | 75                               | 150                 | 3        |
| 11# Pt-10%DD75-<br>T250 | 25                   | 0.075           | 75                               | 250                 | 3        |

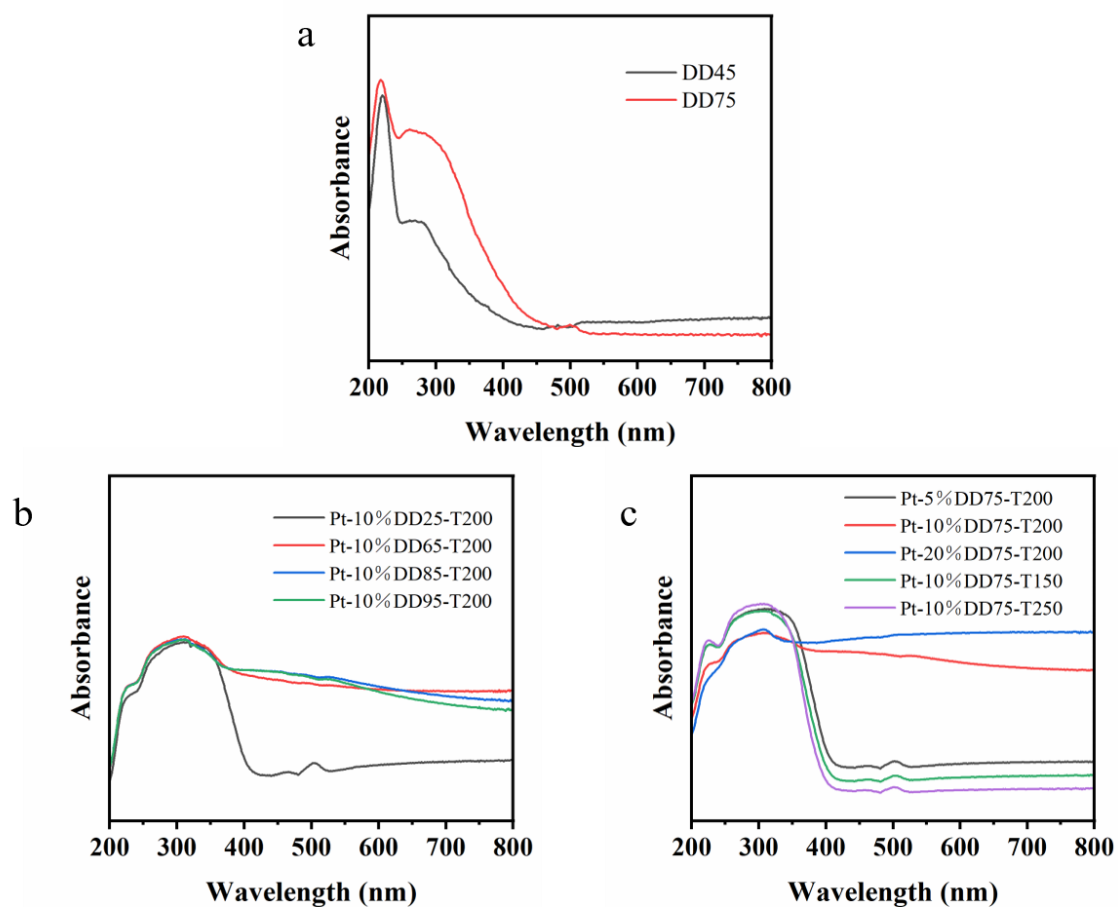

Figure S1. UV-vis diffuse reflectance spectra of as-prepare Pt-Chitosan-TiO<sub>2</sub> samples.

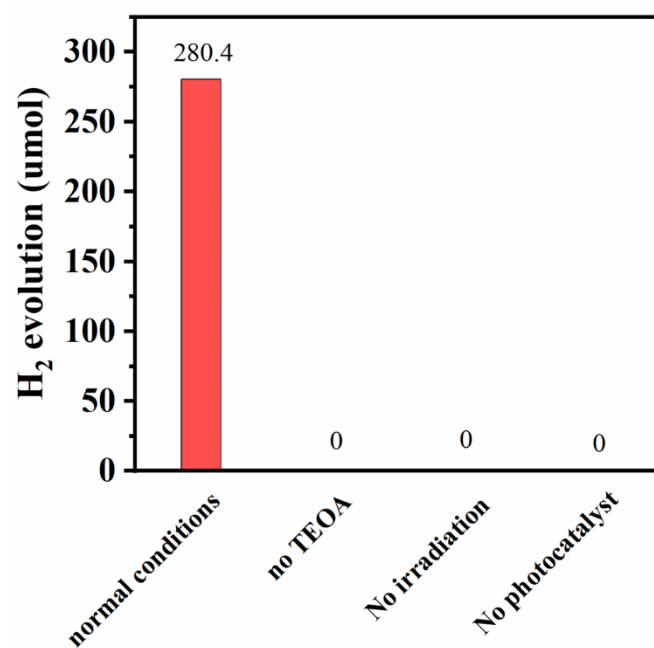

Figure S2. Control experiments for photocatalytic H<sub>2</sub> evolution reaction over Pt-10%DD75-T200.

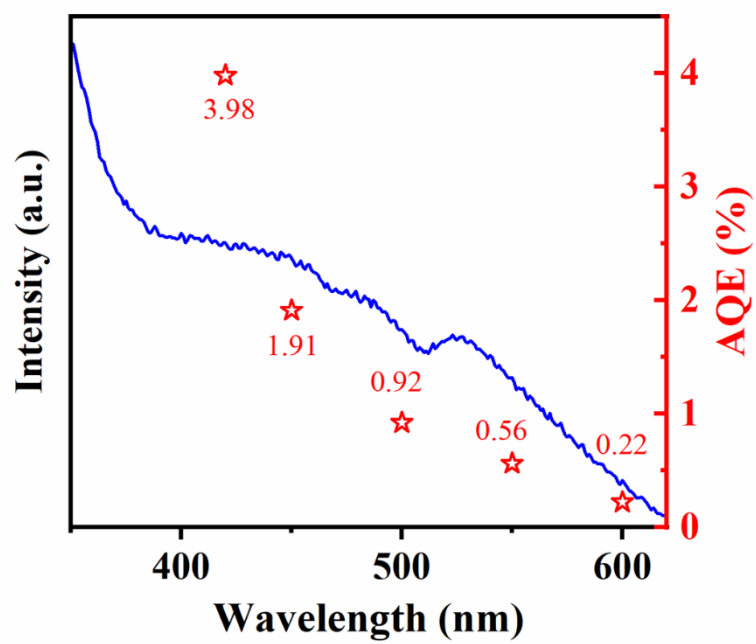

**Figure S3.** Action spectra of Pt-10%DD75-T200 (illumination time: 1h, 10 vol% TEOA, pH = 11.3, 278 K).

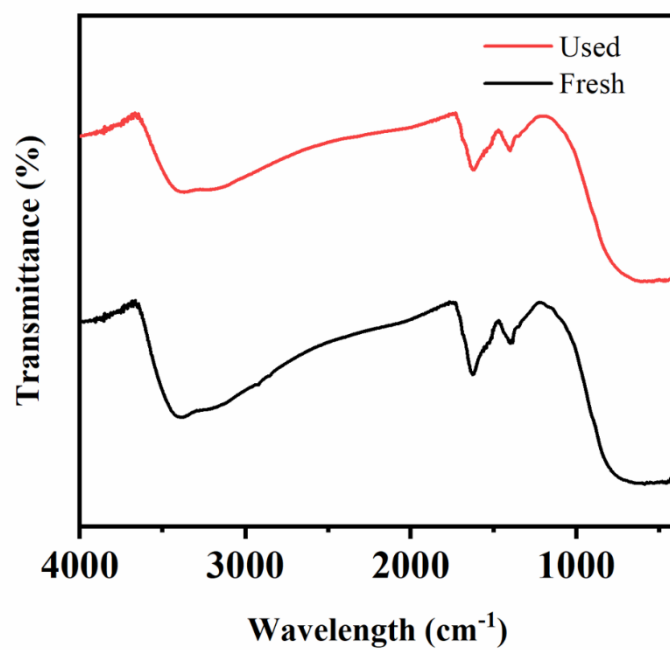

**Figure S4.** FT-IR spectra of Pt-10%DD75-T200 before and after irradiation.

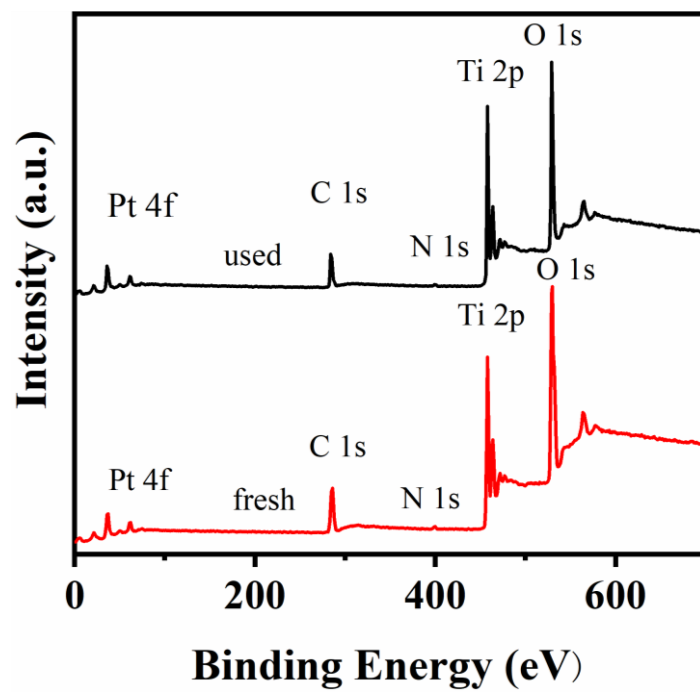

**Figure S5.** XPS spectra of Pt-10%DD75-T200 before and after irradiation.

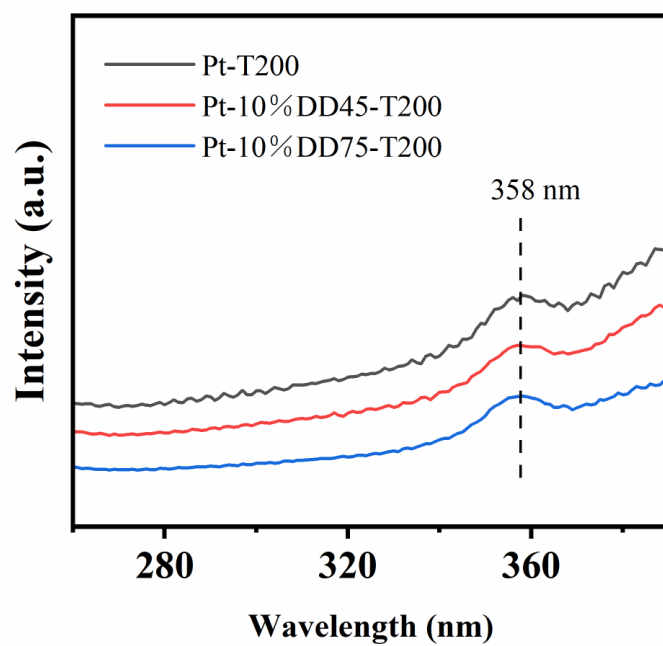

**Figure S6.** Excitation spectra of Pt-T200, Pt-10%DD45-T200 and Pt-10%DD75-T200.
